# Supplementary material for: Self-assembly of the tetrachlorido(oxalato)rhenate(iv) anion with protonated organic cations: X-ray structures and magnetic properties
Source: Royal Society of Chemistry journal article supplement (doi:10.1039/c6ce02025a), 2016-12-13
Supplement: c6ce02025a1.pdf [file c6ce02025a1.pdf]

## Electronic Supplementary Information

# Self-assembly of the tetrachlorido(oxalato)rhenate(IV) anion with protonated organic cations: X-ray structures and magnetic properties

Anders H. Pedersen,<sup>a</sup> Miguel Julve,<sup>b</sup> Euan K. Brechin\*<sup>a</sup> and José Martínez-Lillo\*<sup>b</sup>

<sup>a</sup>EaStCHEM School of Chemistry, The University of Edinburgh, David Brewster Road, EH9 3FJ, Edinburgh, UK.

<sup>b</sup>Instituto de Ciencia Molecular (ICMol), Universitat de València, c/ Catedrático José Beltrán 2, 46980, Paterna, Valencia, Spain.

E-mail: [ebrechin@ed.ac.uk](mailto:ebrechin@ed.ac.uk) and [lillo@uv.es](mailto:lillo@uv.es)

| Table of contents | page |
|-------------------|------|
| Figure S1.....    | 2    |
| Figure S2.....    | 3    |
| Figure S3.....    | 4    |
| Figure S4.....    | 4    |
| Figure S5.....    | 5    |

a)

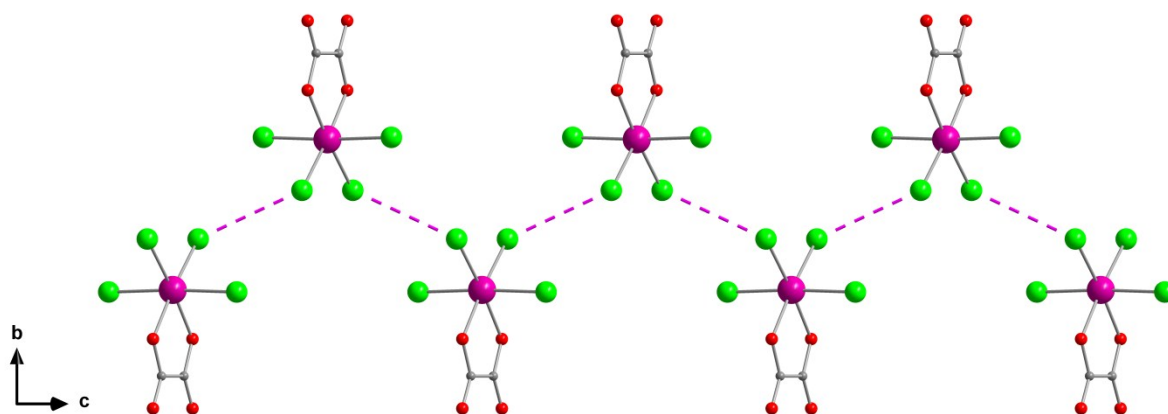

b)

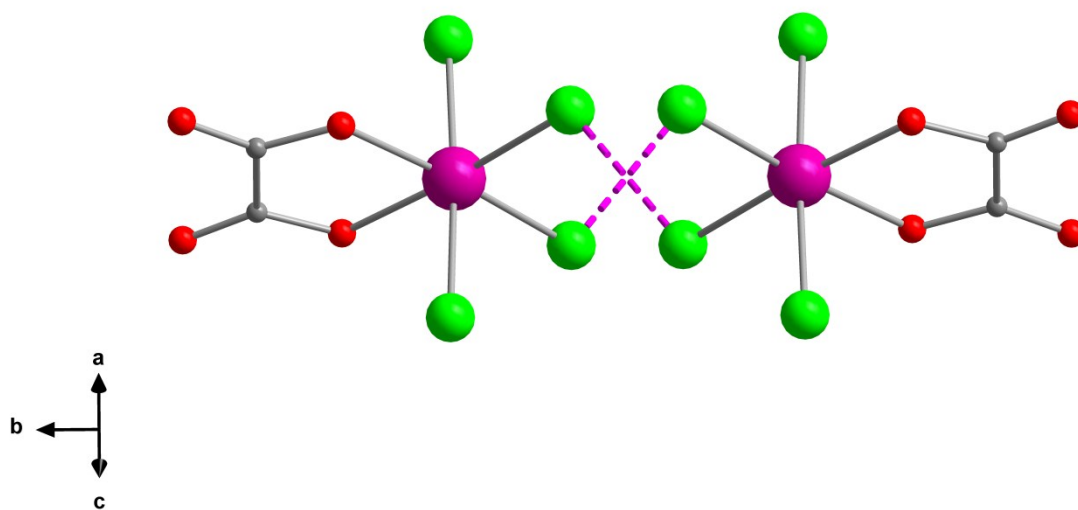

**Figure S1.** (a) View through the  $bc$  plane and (b) along the crystallographic  $[101]$  direction of the one-dimensional arrangement of  $[\text{ReCl}_4(\text{ox})]^{2-}$  anions connected by means of short  $\text{Cl}\cdots\text{Cl}$  contacts (dashed lines) in **1**.

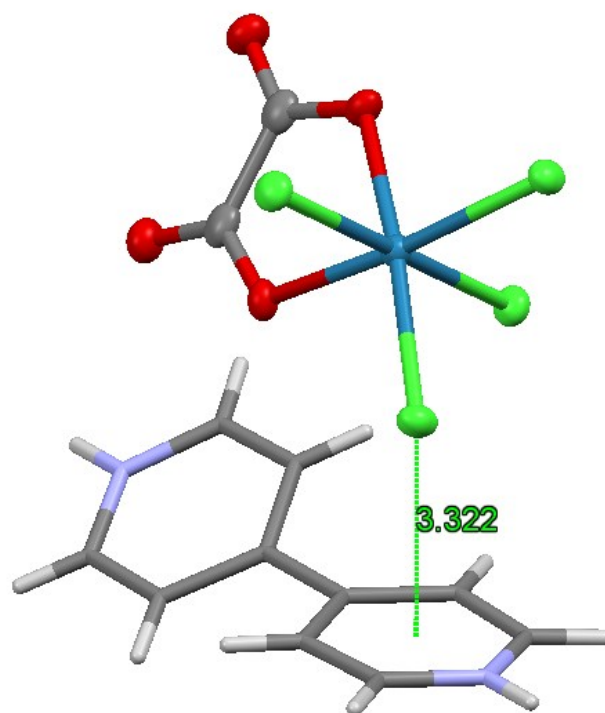

**Figure S2.** Detail of the Cl $\cdots\pi$  interaction between the neighboring [ReCl<sub>4</sub>(ox)]<sup>2-</sup> anions and [H<sub>2</sub>bpy]<sup>2+</sup> cations in **1** (Cl $\cdots\pi$  distance of *ca.* 3.32 Å).

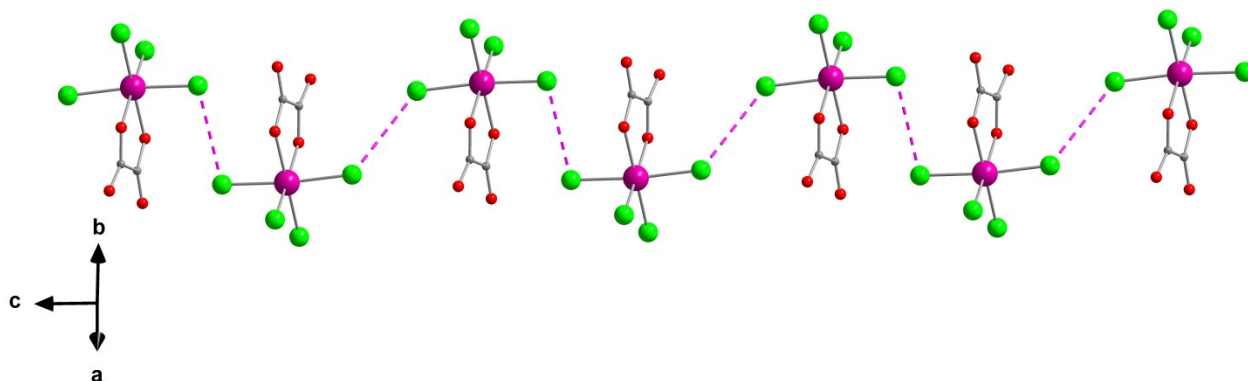

**Figure S3.** Perspective view of the one-dimensional arrangement of  $[\text{ReCl}_4(\text{ox})]^{2-}$  anions connected by means of short  $\text{Cl}\cdots\text{Cl}$  contacts (dashed lines) growing along the crystallographic  $c$  axis in **1**.

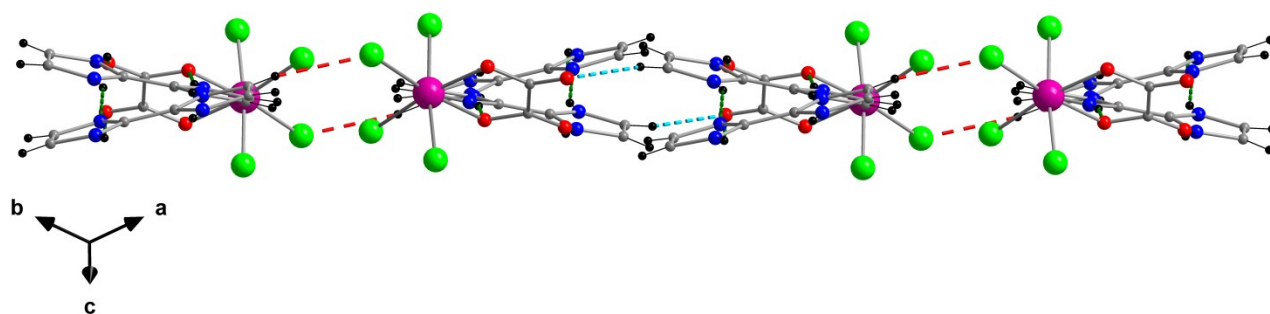

**Figure S4.** View along the crystallographic  $[111]$  direction of the sheets of  $[\text{H}_3\text{biim}]^+$  cations and  $[\text{ReCl}_4(\text{ox})]^{2-}$  anions which are self-assembled through hydrogen bonds (dashed green lines),  $\text{C-H}\cdots\text{Cl}$  (dashed red lines), and  $\text{C-H}\cdots\text{O}$  interactions (dashed blue lines) in **2**. Color code: pink, Re; green, Cl; red, O; blue, N; gray, C; black, H.

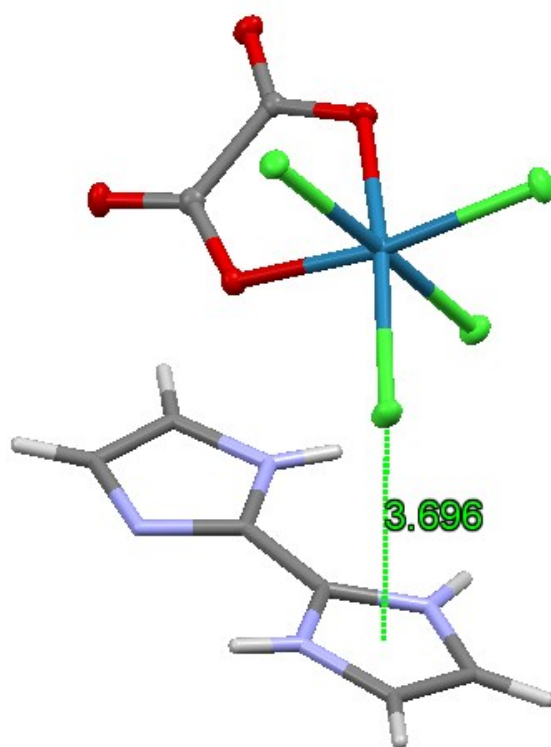

**Figure S5.** Detail of the Cl $\cdots\pi$  interaction between the neighboring [ReCl<sub>4</sub>(ox)]<sup>2-</sup> anions and [H<sub>3</sub>biim]<sup>+</sup> cations in **1** (Cl $\cdots\pi$  distance of *ca.* 3.70 Å).
